# Supplementary material for: Tailoring Hydrothermal Vent Biodiversity Toward Improved Biodiscovery Using a Novel in situ Enrichment Strategy
Source: PubMed Central journal article supplement (PMC7046548; doi:10.3389/fmicb.2020.00249), 2020-02-21
Supplement: Image_1.pdf [file Image_1.pdf]

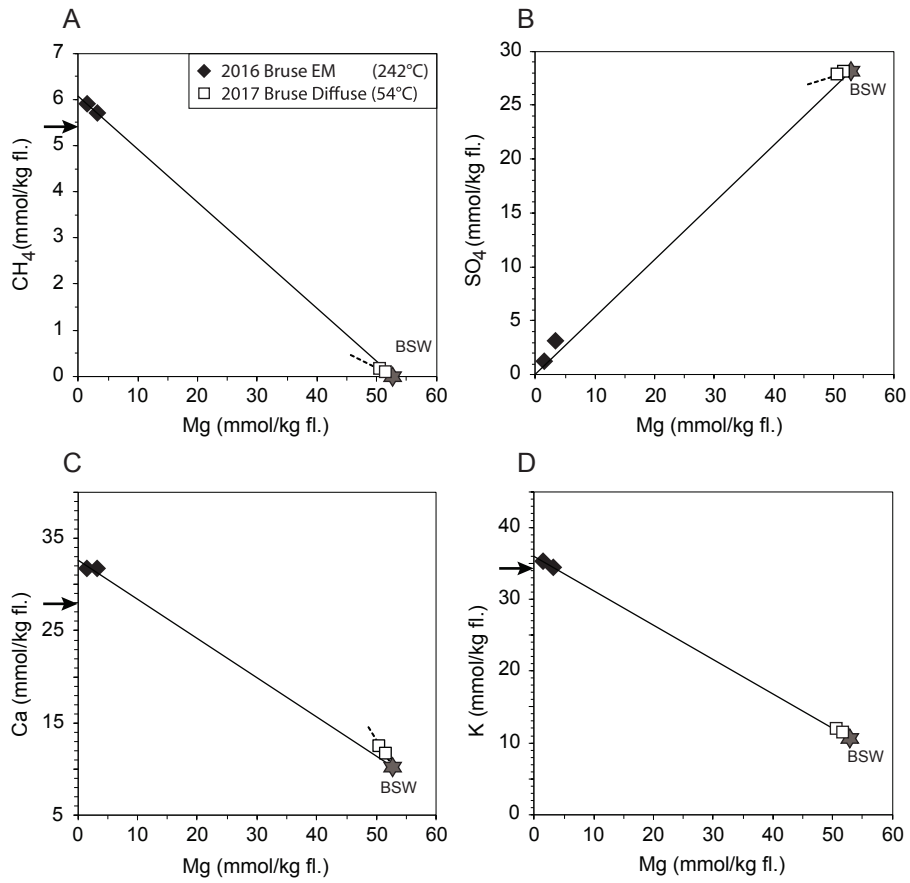

Supplementary Figure S1
